# Supplementary material
Source: publisher figshare collection journal article supplement (https://acs.figshare.com/ndownloader/files/4204039)
Supplement: Supplementary file 1 [file 4204039]

**Supporting information for:**

**The ternary borides  $\text{Cr}_2\text{AlB}_2$ ,  $\text{Cr}_3\text{AlB}_4$  and  $\text{Cr}_4\text{AlB}_6$  – the first members of the series  $(\text{CrB}_2)_n\text{CrAl}$  with  $n = 1, 2, 3$  and a unifying concept for ternary borides as *MAB*-phases**

Martin Ade<sup>1</sup>, Harald Hillebrecht<sup>1,2\*</sup>

\*Dr. Martin Ade, Prof. Dr. H. Hillebrecht

<sup>1</sup>Albert-Ludwigs-Universität Freiburg

Institut für Anorganische und Analytische Chemie

Albertstr. 21

D-79104 Freiburg, Germany

and

<sup>2</sup>Freiburger Materialforschungszentrum FMF

Stefan-Maier-Str. 25

D-79104 Freiburg, Germany

S1-S7: powder XRD patterns (Cu-K $\alpha$ ) of MAB phases with calculated patterns, reflections and Miller Indices given on top and measured patterns at the bottom. Impurity phases are indicated by symbols.

Figure S1: **Cr<sub>2</sub>AlB<sub>2</sub>**, (\*) CrB (oC8, *Cmcm*, ICSD No.: 44249, ICDD PDF No. 089-3587).

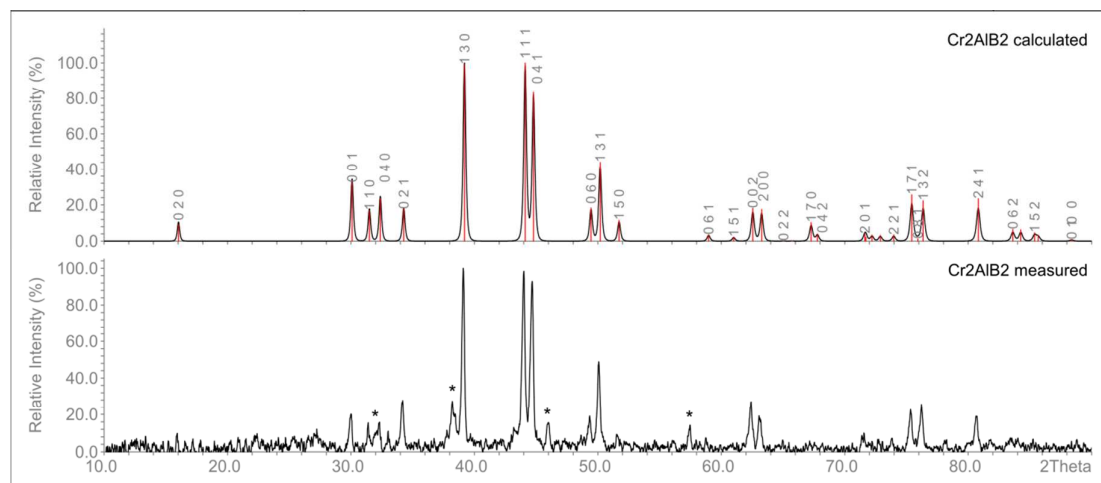

Figure S2: **Cr<sub>3</sub>AlB<sub>4</sub>**

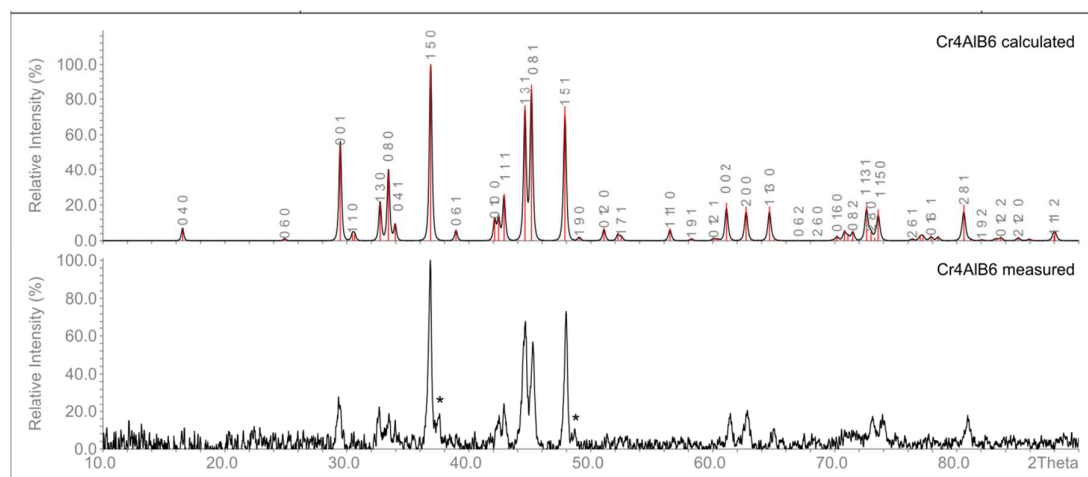

Figure S3: **Cr<sub>4</sub>AlB<sub>6</sub>**, (\*) Cr<sub>3</sub>AlB<sub>4</sub>.

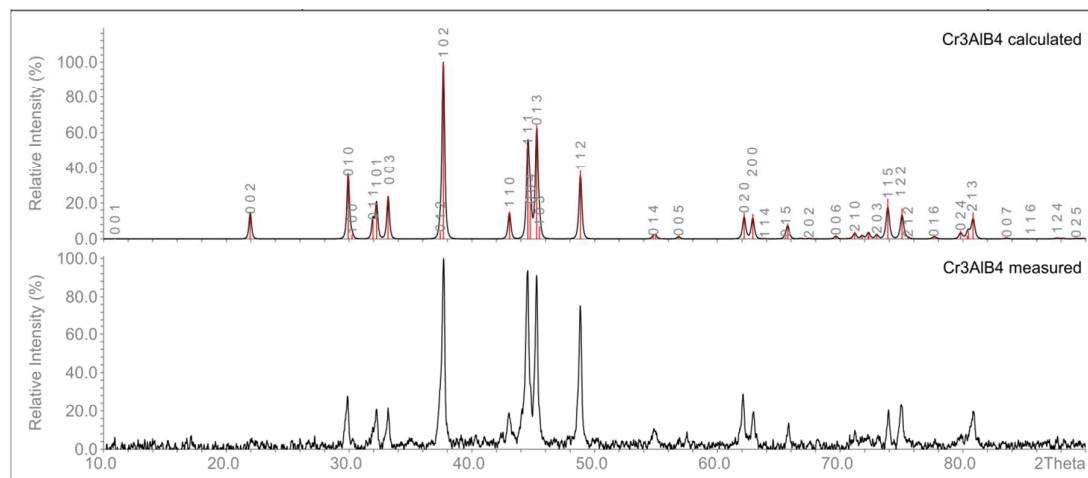

Figure S4: **Mn<sub>2</sub>AlB<sub>2</sub>**, (\*) MnAl<sub>6</sub> (oS28, *Cmcm*, ICSD No. 57973; ICDD PDF No. 71-5858), (o) Al<sub>0.9</sub>B<sub>2</sub> (hP3, *P6/mmm*, ICSD No. 99639, ICDD PDF No. 74-4445).

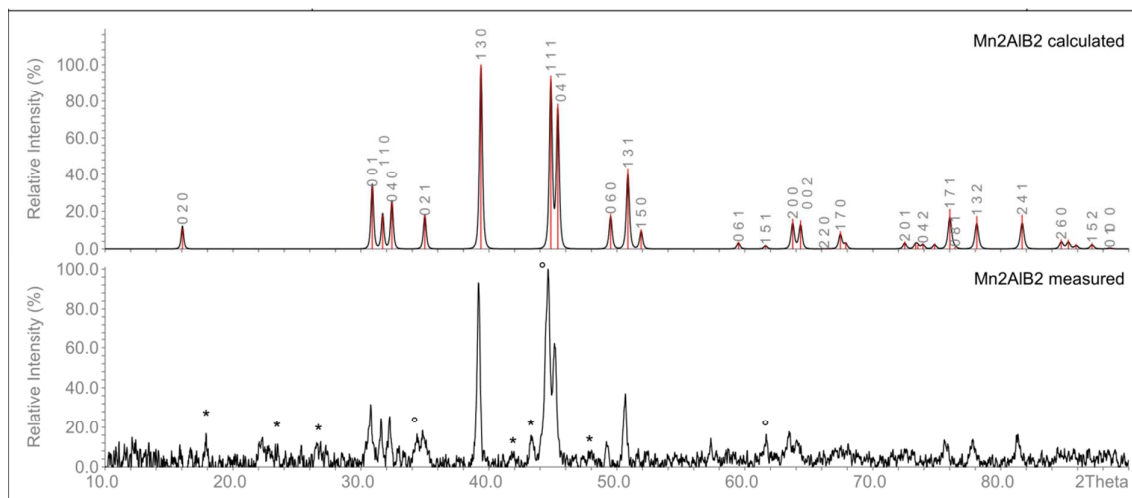

Figure S5: **Fe<sub>2</sub>AlB<sub>2</sub>**, (\*) Fe<sub>4</sub>Al<sub>13</sub>, mS102, *C2/m*, ICSD No. 151129, ICDD PDF No. 73-3008;

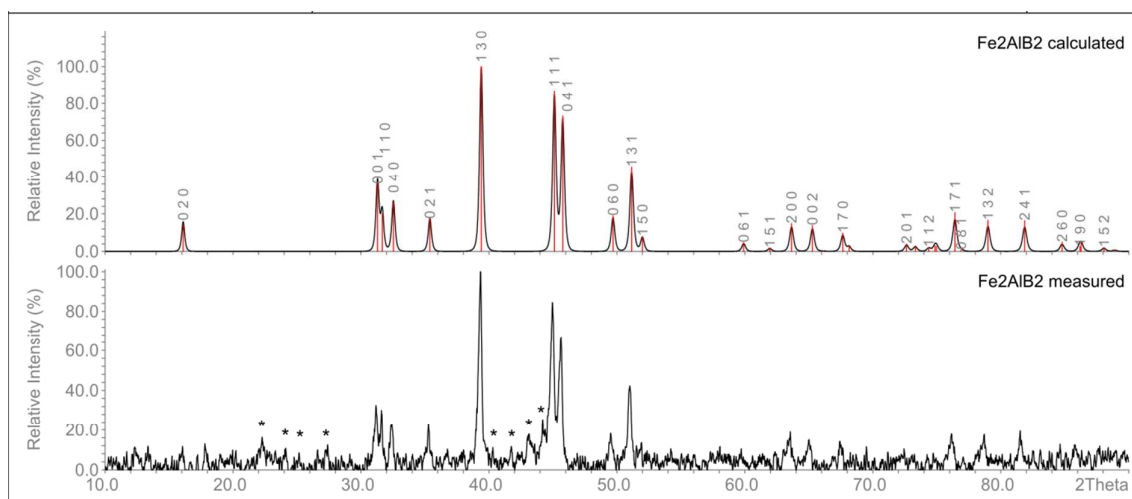

Figure S6: **MoAlB**

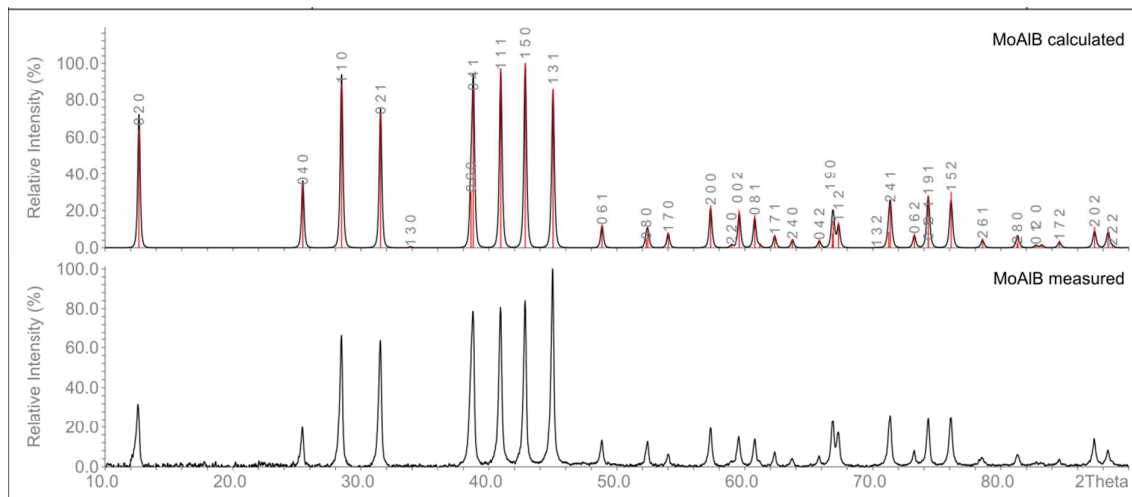

S7: **WAIB**; on top: WB calculated (tl16,  $I_{41}/amd$ , ICSD No. 424240) middle: WAIB calculated; bottom: WAIB sample measured, (\*)  $Al_2O_3$  from crucible (hR10,  $R\bar{3}c$ , ICSD No. 26790; ICDD PDF No. 74-1081), (o)  $SiO_2$  (quartz, from agate mortar,  $hP9$ ,  $P3_121$ , ICSD No. 29210, ICDD PDF No. 85-0865).

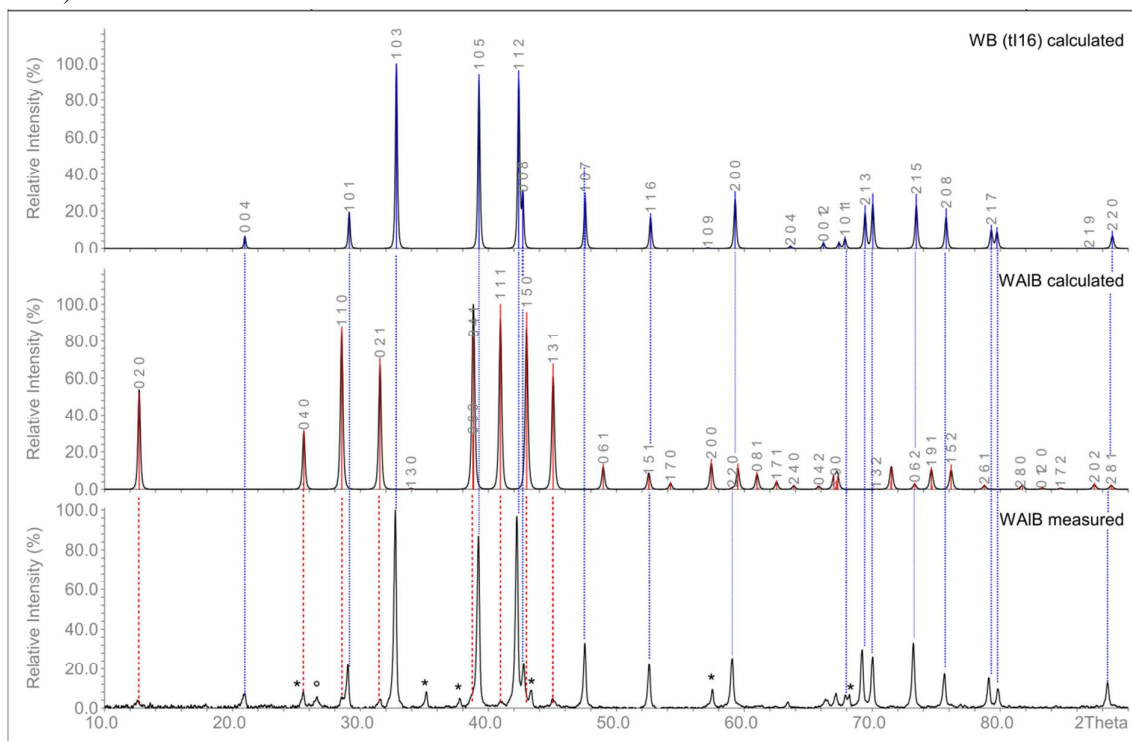

Figure S8: SEM pictures of polished samples – phase identification by EDX:

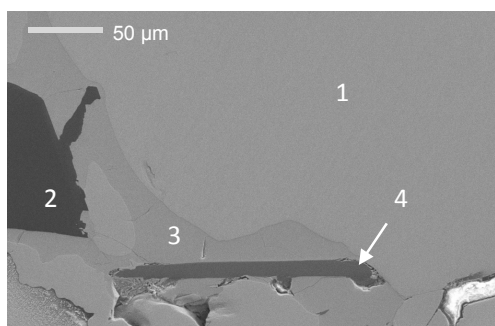

$Fe_2AlB_2$

- 1:  $Fe_2AlB_2$
- 2:  $AlB_{12}$
- 3:  $Fe_4Al_{13}$
- 4:  $(Al,Fe)B_2$

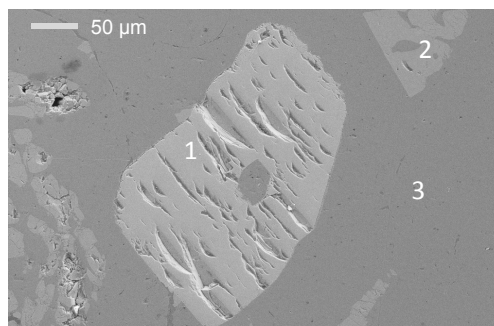

$Mn_2AlB_2$

1.  $Mn_2AlB_2$  (with inclusion of Al)
2.  $MnAl_6$
3. Al
